# Supplementary material
Source: PubMed Central journal article supplement (PMC8329209)
Supplement: 41416_2021_1400_MOESM1_ESM.pdf [file 41416_2021_1400_MOESM1_ESM.pdf]

## Supplementary Materials

1  
2  
3  
4  
5  
6  
7

**Association of HLA gene expression with cancer prognosis and immunotherapy efficacy**

Evelien Schaafsma, Chloe M. Fugle, Xiaofeng Wang, Chao Cheng

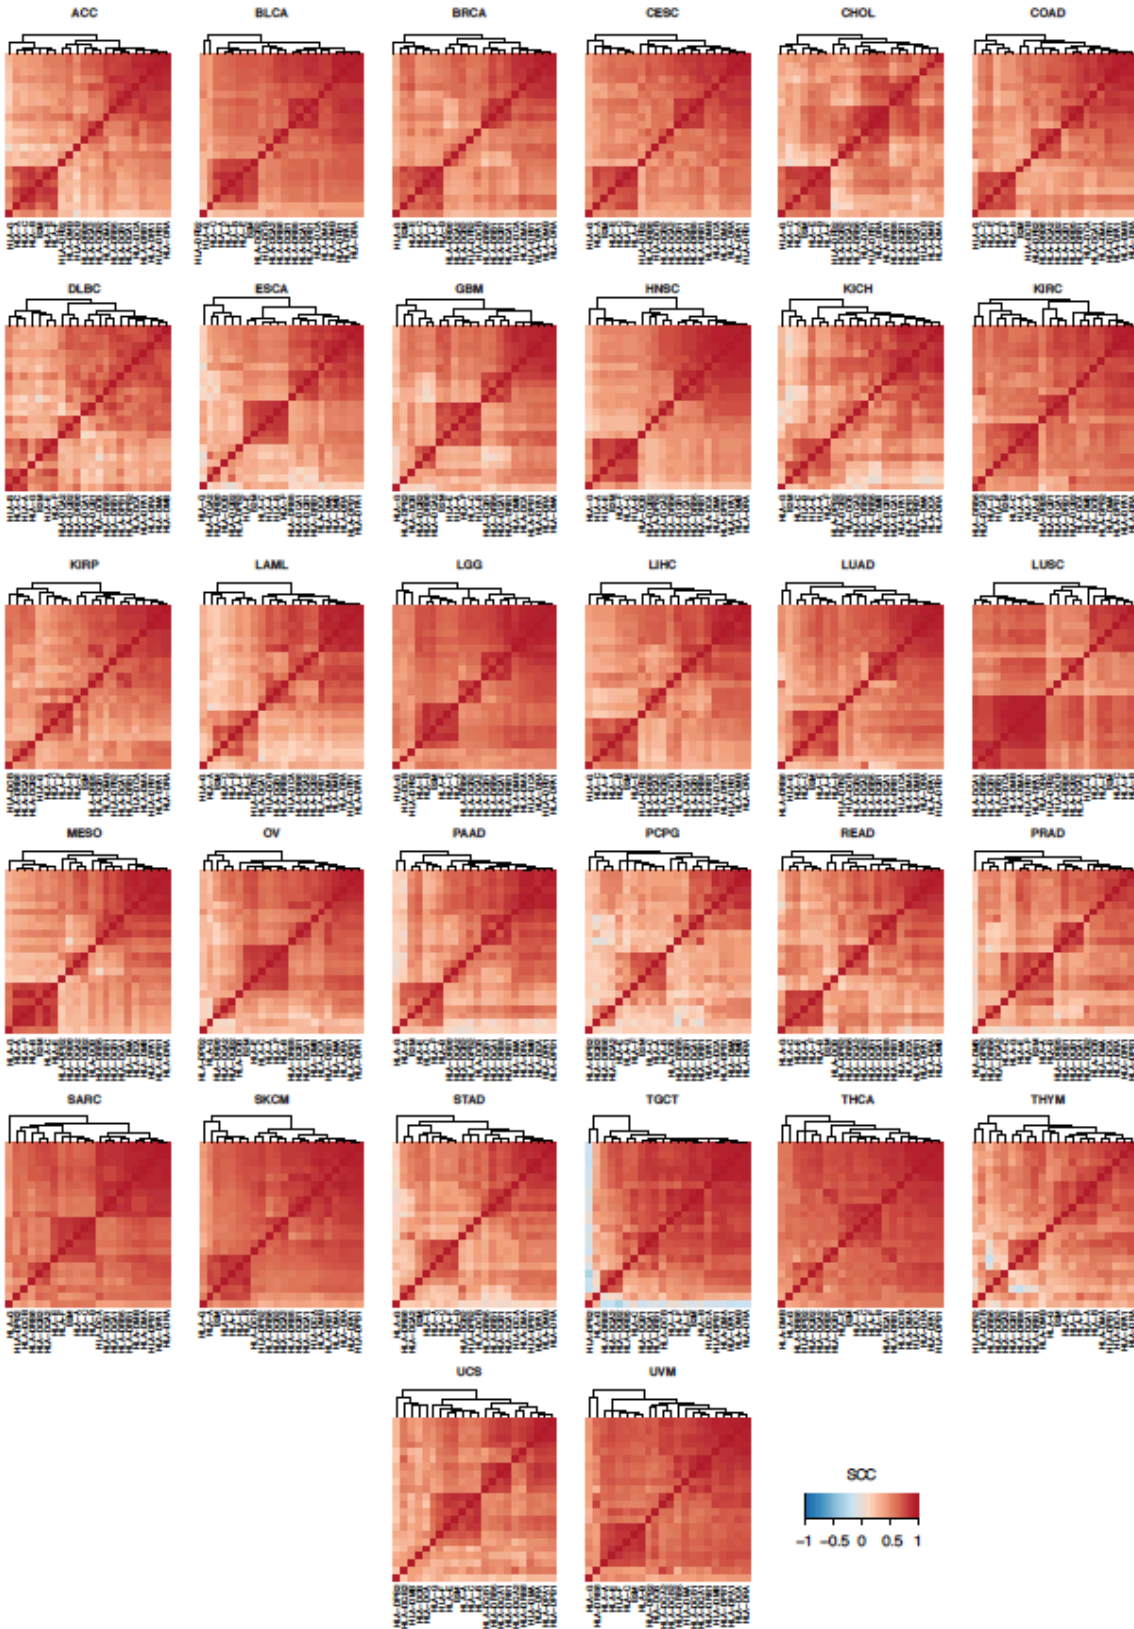

8  
9 **Supplemental Figure 1.** Correlation matrices of HLA/B2M gene expression for all investigated  
10 cancer types. SCC = Spearman correlation coefficient.

11  
12

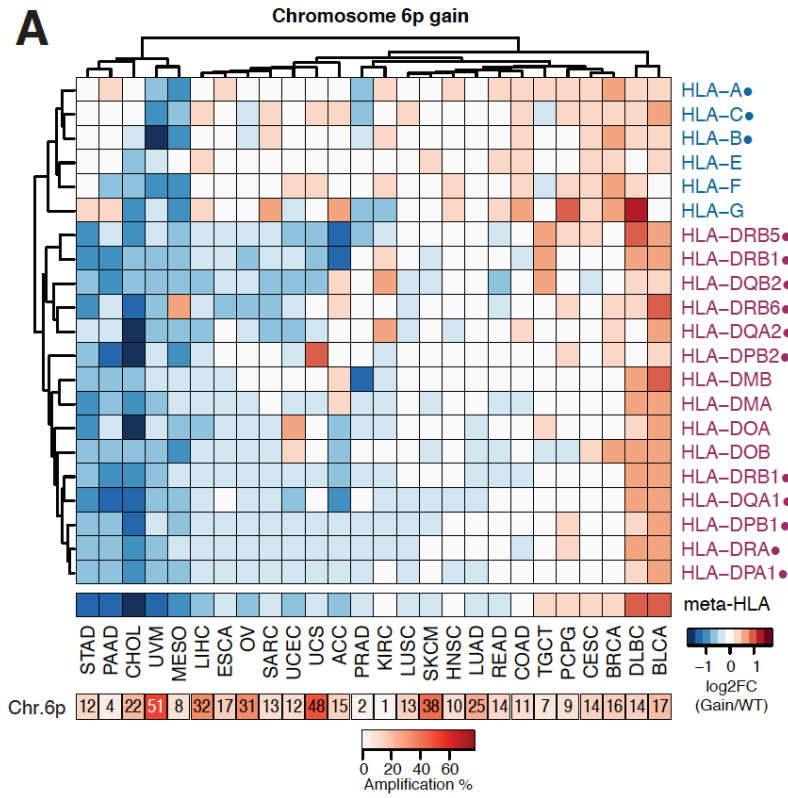

13  
14  
15  
16  
17  
18

**Supplemental Figure 2. A.** Heatmap of the log2 fold change (log2fc) comparing HLA and B2M expression between patients with chr6p gain and patients without chr6p CNV.

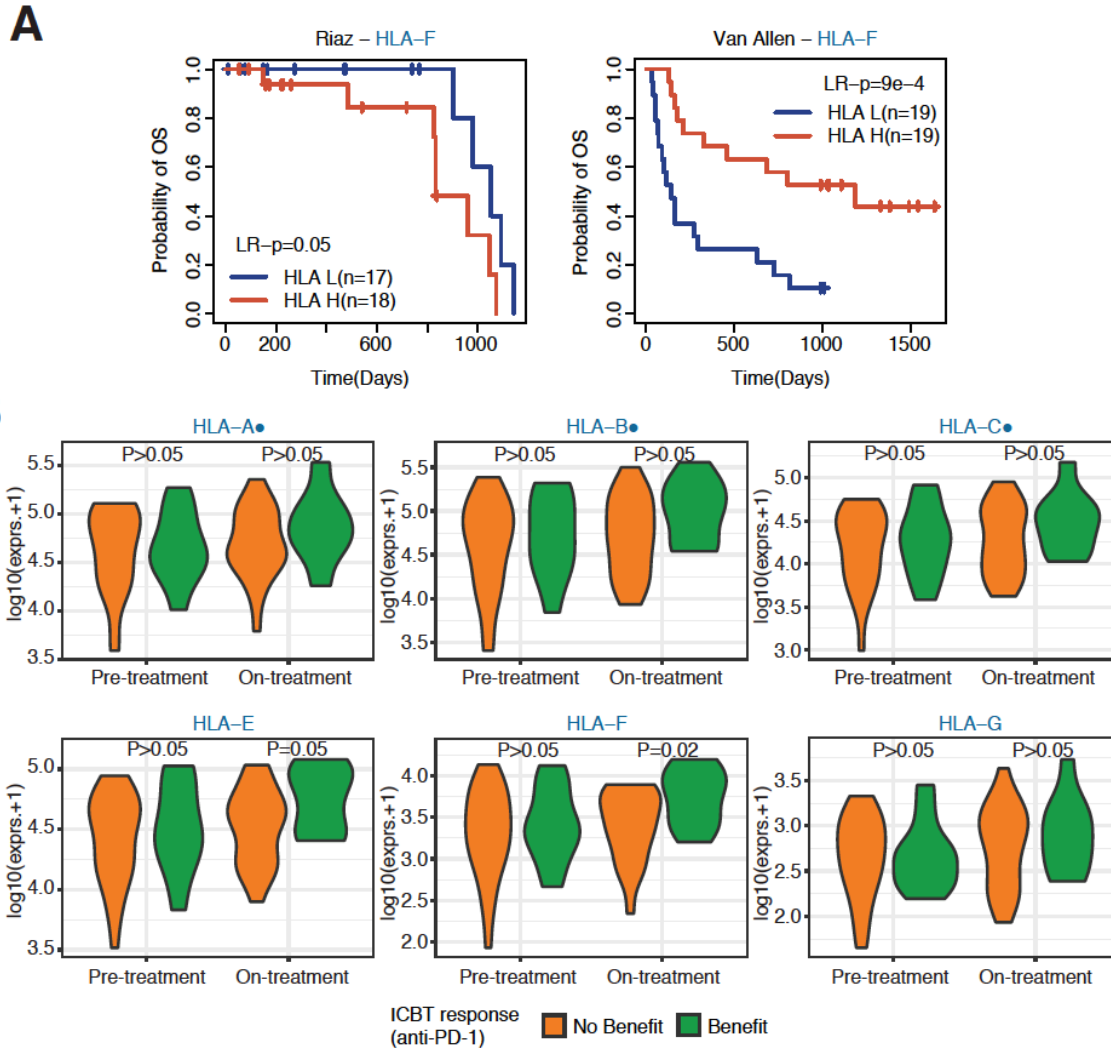

19  
20  
21  
22  
23  
24  
25  
26

**Supplemental Figure 3. A.** KM plot comparing overall survival between patients with low and high HLA-F expression in the Riaz and Van Allen datasets. Significance indicated by Log-rank tests. **B.** Violin plots comparing the gene expression of 6 class I HLA genes between patients who benefitted or did not benefit from anti-PD-1 treatment in pre- or on-treatment biopsies in the Riaz dataset. Significance calculated by two-sided Student's t-tests.

27 **Supplementary Table 1.** TCGA datasets and number of patients included in this study.  
28

| CancerType | Normal | Tumor |
|------------|--------|-------|
| ACC        | 0      | 79    |
| BLCA       | 19     | 408   |
| BRCA       | 112    | 1093  |
| CESC       | 0      | 304   |
| CHOL       | 0      | 36    |
| COAD       | 41     | 285   |
| DLBC       | 0      | 48    |
| ESCA       | 11     | 184   |
| GBM        | 160    | 676   |
| GBMLGG     | 0      | 676   |
| HNSC       | 44     | 520   |
| KICH       | 25     | 66    |
| KIPAN      | 129    | 889   |
| KIRC       | 72     | 533   |
| KIRP       | 32     | 290   |
| LAML       | 0      | 173   |
| LGG        | 676    | 516   |
| LIHC       | 50     | 371   |
| LUAD       | 59     | 515   |
| LUSC       | 51     | 501   |
| MESO       | 0      | 87    |
| OV         | 0      | 304   |
| PAAD       | 0      | 178   |
| PCPG       | 0      | 179   |
| PRAD       | 52     | 497   |
| READ       | 51     | 379   |
| SARC       | 0      | 259   |
| SKCM       | 0      | 469   |
| STAD       | 35     | 415   |
| TGCT       | 0      | 150   |
| THCA       | 59     | 501   |
| THYM       | 0      | 120   |
| UCEC       | 24     | 177   |
| UCS        | 0      | 57    |
| UVM        | 0      | 80    |

29  
30

31 **Supplementary Table 2.** Proportion of variance explained by the first 5 PCs.  
 32

|      | PC1   | PC2   | PC3   | PC4   | PC5   |
|------|-------|-------|-------|-------|-------|
| ACC  | 0.585 | 0.104 | 0.074 | 0.049 | 0.035 |
| BLCA | 0.688 | 0.071 | 0.049 | 0.032 | 0.023 |
| BRCA | 0.555 | 0.107 | 0.089 | 0.039 | 0.031 |
| CESC | 0.637 | 0.084 | 0.057 | 0.038 | 0.032 |
| CHOL | 0.561 | 0.120 | 0.087 | 0.055 | 0.046 |
| COAD | 0.570 | 0.171 | 0.065 | 0.038 | 0.028 |
| DLBC | 0.571 | 0.104 | 0.084 | 0.048 | 0.040 |
| ESCA | 0.500 | 0.152 | 0.099 | 0.050 | 0.039 |
| GBM  | 0.500 | 0.169 | 0.080 | 0.039 | 0.035 |
| HNSC | 0.605 | 0.122 | 0.062 | 0.036 | 0.035 |
| KICH | 0.593 | 0.092 | 0.088 | 0.048 | 0.035 |
| KIRC | 0.620 | 0.092 | 0.085 | 0.032 | 0.029 |
| KIRP | 0.548 | 0.108 | 0.097 | 0.051 | 0.033 |
| LAML | 0.653 | 0.095 | 0.054 | 0.036 | 0.027 |
| LGG  | 0.708 | 0.081 | 0.046 | 0.025 | 0.023 |
| LIHC | 0.565 | 0.118 | 0.086 | 0.038 | 0.034 |
| LUAD | 0.583 | 0.108 | 0.074 | 0.043 | 0.032 |
| LUSC | 0.668 | 0.079 | 0.062 | 0.029 | 0.028 |
| MESO | 0.533 | 0.149 | 0.106 | 0.040 | 0.034 |
| OV   | 0.529 | 0.146 | 0.070 | 0.046 | 0.034 |
| PAAD | 0.588 | 0.099 | 0.075 | 0.045 | 0.037 |
| PCPG | 0.410 | 0.141 | 0.095 | 0.055 | 0.048 |
| PRAD | 0.482 | 0.109 | 0.082 | 0.079 | 0.037 |
| READ | 0.526 | 0.198 | 0.061 | 0.041 | 0.033 |
| SARC | 0.706 | 0.067 | 0.065 | 0.031 | 0.023 |
| SKCM | 0.715 | 0.071 | 0.051 | 0.029 | 0.020 |
| STAD | 0.509 | 0.153 | 0.079 | 0.043 | 0.037 |
| TGCT | 0.610 | 0.133 | 0.084 | 0.034 | 0.028 |
| THCA | 0.729 | 0.058 | 0.043 | 0.032 | 0.022 |
| THYM | 0.474 | 0.172 | 0.074 | 0.053 | 0.042 |
| UCEC | 0.557 | 0.124 | 0.066 | 0.038 | 0.036 |
| UCS  | 0.570 | 0.090 | 0.072 | 0.060 | 0.043 |
| UVM  | 0.694 | 0.078 | 0.064 | 0.029 | 0.023 |

33  
 34

35 **Supplementary Table 3.** Incidence of genomic alterations of HLA genes in TCGA cancer types.  
 36

|      | CNV     |                       |          |        |        |          |        |        | Mutations                  |            |             |            |             |            |             |          |           |
|------|---------|-----------------------|----------|--------|--------|----------|--------|--------|----------------------------|------------|-------------|------------|-------------|------------|-------------|----------|-----------|
|      | Samples | Samples with CNV data | # Normal | # Loss | # Gain | % Normal | % Loss | % Gain | Samples with mutation data | # HLA-A WT | # HLA-A mut | # HLA-B WT | # HLA-B mut | # HLA-C WT | # HLA-C mut | # B2M WT | # B2M mut |
| ACC  | 79      | 74                    | 45       | 18     | 11     | 60.81    | 24.32  | 14.86  | 79                         | 79         | 0           | 79         | 0           | 79         | 0           | 78       | 1         |
| BLCA | 408     | 353                   | 215      | 78     | 60     | 60.91    | 22.10  | 17.00  | 408                        | 403        | 5           | 403        | 5           | 406        | 2           | 405      | 3         |
| BRCA | 1100    | 929                   | 659      | 126    | 144    | 70.94    | 13.56  | 15.50  | 1048                       | 1041       | 7           | 1044       | 4           | 1047       | 1           | 1045     | 3         |
| CESC | 306     | 264                   | 198      | 30     | 36     | 75.00    | 11.36  | 13.64  | 304                        | 282        | 22          | 283        | 21          | 302        | 2           | 298      | 6         |
| CHOL | 36      | 36                    | 23       | 5      | 8      | 63.89    | 13.89  | 22.22  | 36                         | 35         | 1           | 36         | 0           | 36         | 0           | 35       | 1         |
| COAD | 478     | 433                   | 355      | 32     | 46     | 81.99    | 7.39   | 10.62  | 451                        | 428        | 23          | 431        | 20          | 442        | 9           | 431      | 20        |
| DLBC | 48      | 44                    | 38       | 0      | 6      | 86.36    | 0.00   | 13.64  | 7                          | 0          | 5           | 0          | 7           | 0          | 1           | 0        | 7         |
| ESCA | 185     | 144                   | 87       | 32     | 25     | 60.42    | 22.22  | 17.36  | 184                        | 181        | 3           | 182        | 2           | 183        | 1           | 182      | 2         |
| GBM  | 166     | 154                   | 129      | 21     | 4      | 83.77    | 13.64  | 2.60   | 163                        | 160        | 3           | 162        | 1           | 163        | 0           | 162      | 1         |
| HNSC | 522     | 470                   | 366      | 59     | 45     | 77.87    | 12.55  | 9.57   | 504                        | 484        | 20          | 487        | 17          | 502        | 2           | 498      | 6         |
| KICH | 66      | 65                    | 14       | 50     | 1      | 21.54    | 76.92  | 1.54   | 66                         | 66         | 0           | 66         | 0           | 66         | 0           | 66       | 0         |
| KIRC | 534     | 476                   | 391      | 78     | 7      | 82.14    | 16.39  | 1.47   | 339                        | 337        | 2           | 339        | 0           | 339        | 0           | 339      | 0         |
| KIRP | 291     | 276                   | 250      | 23     | 3      | 90.58    | 8.33   | 1.09   | 288                        | 284        | 4           | 288        | 0           | 285        | 3           | 287      | 1         |
| LAML | 173     | 109                   | 109      | 0      | 0      | 100.00   | 0.00   | 0.00   | 7                          | 5          | 2           | 3          | 1           | 0          | 0           | 0        | 0         |
| LGG  | 530     | 509                   | 486      | 22     | 1      | 95.48    | 4.32   | 0.20   | 527                        | 520        | 7           | 526        | 1           | 527        | 0           | 527      | 0         |
| LIHC | 373     | 340                   | 214      | 16     | 110    | 62.94    | 4.71   | 32.35  | 371                        | 367        | 4           | 365        | 6           | 369        | 2           | 370      | 1         |
| LUAD | 517     | 447                   | 261      | 75     | 111    | 58.39    | 16.78  | 24.83  | 515                        | 508        | 7           | 511        | 4           | 512        | 3           | 508      | 7         |
| LUSC | 501     | 401                   | 261      | 86     | 54     | 65.09    | 21.45  | 13.47  | 494                        | 479        | 15          | 486        | 8           | 492        | 2           | 487      | 7         |
| MESO | 87      | 79                    | 65       | 8      | 6      | 82.28    | 10.13  | 7.59   | 83                         | 82         | 1           | 83         | 0           | 83         | 0           | 83       | 0         |
| OV   | 307     | 210                   | 106      | 39     | 65     | 50.48    | 18.57  | 30.95  | 220                        | 219        | 1           | 220        | 0           | 220        | 0           | 219      | 1         |
| PAAD | 179     | 143                   | 92       | 46     | 5      | 64.34    | 32.17  | 3.50   | 177                        | 175        | 2           | 177        | 0           | 177        | 0           | 177      | 0         |
| PCPG | 184     | 162                   | 146      | 2      | 14     | 90.12    | 1.23   | 8.64   | 184                        | 182        | 2           | 184        | 0           | 184        | 0           | 184      | 0         |
| PRAD | 498     | 466                   | 450      | 9      | 7      | 96.57    | 1.93   | 1.50   | 498                        | 498        | 0           | 497        | 1           | 497        | 1           | 498      | 0         |
| READ | 167     | 149                   | 112      | 16     | 21     | 75.17    | 10.74  | 14.09  | 153                        | 153        | 0           | 150        | 3           | 153        | 0           | 148      | 5         |
| SARC | 263     | 224                   | 147      | 48     | 29     | 65.63    | 21.43  | 12.95  | 257                        | 256        | 1           | 257        | 0           | 257        | 0           | 257      | 0         |
| SKCM | 472     | 411                   | 202      | 51     | 158    | 49.15    | 12.41  | 38.44  | 472                        | 467        | 5           | 466        | 6           | 466        | 6           | 467      | 5         |
| STAD | 415     | 357                   | 272      | 41     | 44     | 76.19    | 11.48  | 12.32  | 413                        | 395        | 18          | 391        | 22          | 405        | 8           | 396      | 17        |
| TGCT | 156     | 148                   | 122      | 16     | 10     | 82.43    | 10.81  | 6.76   | 156                        | 155        | 1           | 156        | 0           | 156        | 0           | 156      | 0         |
| THCA | 509     | 468                   | 465      | 2      | 1      | 99.36    | 0.43   | 0.21   | 498                        | 496        | 2           | 498        | 0           | 498        | 0           | 497      | 1         |
| THYM | 120     | 101                   | 83       | 18     | 0      | 82.18    | 17.82  | 0.00   | 119                        | 119        | 0           | 119        | 0           | 118        | 1           | 119      | 0         |
| UCEC | 547     | 498                   | 425      | 14     | 59     | 85.34    | 2.81   | 11.85  | 542                        | 524        | 18          | 527        | 15          | 534        | 8           | 524      | 18        |
| UCS  | 57      | 50                    | 22       | 4      | 24     | 44.00    | 8.00   | 48.00  | 57                         | 57         | 0           | 56         | 1           | 56         | 1           | 57       | 0         |
| UVM  | 80      | 80                    | 39       | 0      | 41     | 48.75    | 0.00   | 51.25  | 80                         | 80         | 0           | 80         | 0           | 80         | 0           | 80       | 0         |
